# Supplementary material for: High crystallinity Sn crystals on Ni foam: an ideal bimetallic catalyst for the electroreduction of carbon dioxide to syngas
Source: Royal Society of Chemistry journal article supplement (doi:10.1039/d0ra03477k), 2020-01-01
Supplement: d0ra03477k1.pdf [file d0ra03477k1.pdf]

## Supplementary File

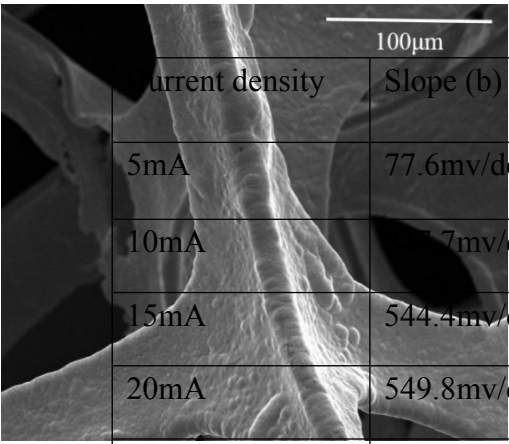

| Current density | Slope (b)   | Intercept(a) | $i_0/\text{mA}\cdot\text{cm}^{-2}$ (Exchange current density) |
|-----------------|-------------|--------------|---------------------------------------------------------------|
| 5mA             | 77.6mv/dec  | 0.7171       | $5.74\cdot 10^{-10}$                                          |
| 10mA            | 544.4mv/dec | 0.82205      | 0.0931                                                        |
| 15mA            | 544.4mv/dec | 0.79443      | 0.2064                                                        |
| 20mA            | 549.8mv/dec | 0.9024       | 0.0228                                                        |
| 25mA            | 749.2mv/dec | 0.57163      | 0.1726                                                        |

Figure

S1. SEM images of Ni foam

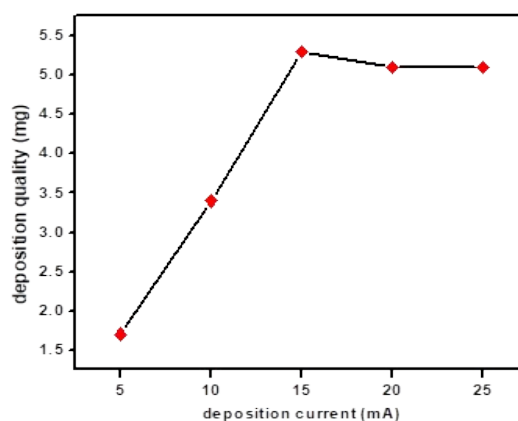

Figure S2. The variation curve of deposition mass

Table S1. Calculation of the Tafel curve

To probe the kinetics of CO<sub>2</sub> reduction, tafel plot data for CO<sub>2</sub> reduction to CO on Sn@Ni of different plating current were obtained and the tafel relationship can be expressed as follows:

$$E = E_0 - \frac{2.303RT}{\alpha n_{\alpha} F} \log(i_0) + \frac{2.303RT}{\alpha n_{\alpha} F} \log(i_{CO}) \quad 1$$

$$b = \frac{2.303RT}{\alpha n_{\alpha} F} \quad 2$$

where E is the applied cathode potential, E<sub>0</sub> is the standard potential for the CO<sub>2</sub>/CO couple, b is the Tafel slope, a is the electron transfer coefficient, n<sub>α</sub> is the electron transfer number, i<sub>0</sub> is the exchange current density, and i<sub>CO</sub> is the partial current density for CO<sub>2</sub> reduction to produce CO.
